# Supplementary material for: CCAAT/Enhancer-Binding Protein Delta Regulates Glioblastoma Survival through Catalase-Mediated Hydrogen Peroxide Clearance
Source: Oxid Med Cell Longev. 2022 Aug 18;2022:4081380. doi: 10.1155/2022/4081380 (PMC9411925; doi:10.1155/2022/4081380)
Supplement: Supplementary 2 — Supplementary Figure 2: reduced CEBPD expression attenuates cell viability and induces cell apoptosis in GBM. (A) The U373MG or T98G cells were transiently transfected with control siRNA or CEBPD siRNA for 72 h and then subjected to CCK-8 viability assay. (B) Caspase 3/7 activity is increased in CEBPD knockdown GBM cells. Cells were harvested from U373MG or T98G stable clones, and caspase 3/7 activity was determined by. (C) The U373MG or T98G cells were transiently transfected with control siRNA or CEBPD siRNAs for 72 h and then stained with Annexin V and Propidium Iodide (PI) for flow cytometry analysis. Bars represent the means ± SEM from three independent experiments. Differences among groups were determined with one-way or two-way ANOVA followed by Tukey's multiple comparison test. ∗∗∗p < 0.001, ∗∗p < 0.01, and ∗p < 0.05. ns: no significant; shLuc: shRNA for luciferase; shB7, shC7: shRNAs for CEBPD; WT: parental cells; siNeg: siRNA for negative control; si2895, si2896: siRNAs for CEBPD. [file 4081380.f2.pdf]

**A**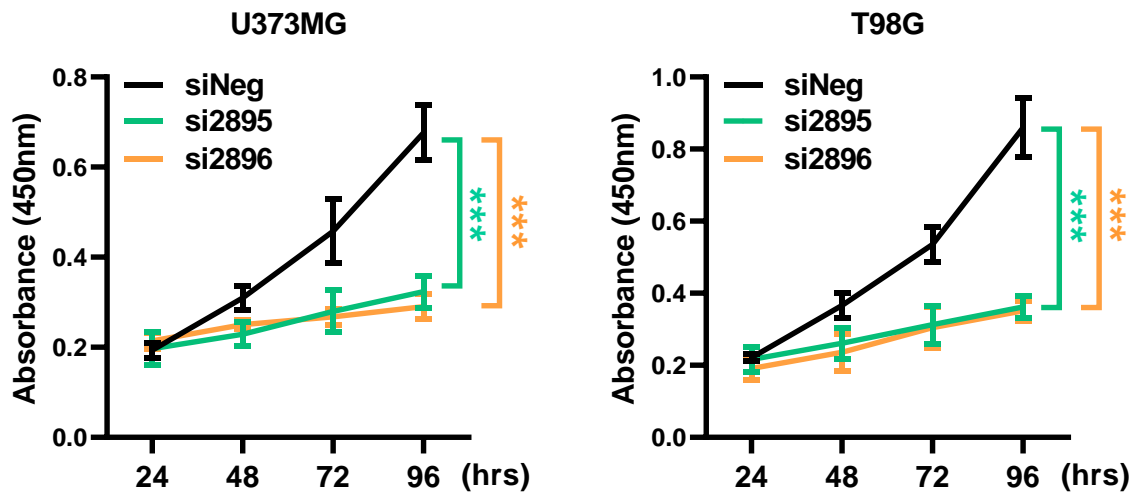**B**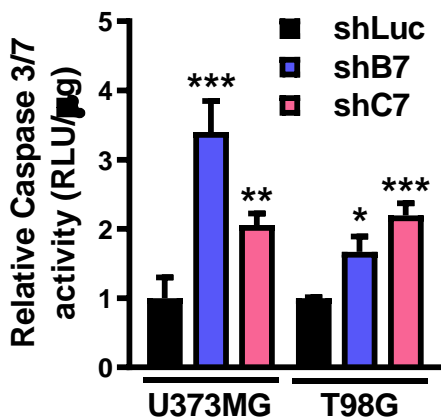**C**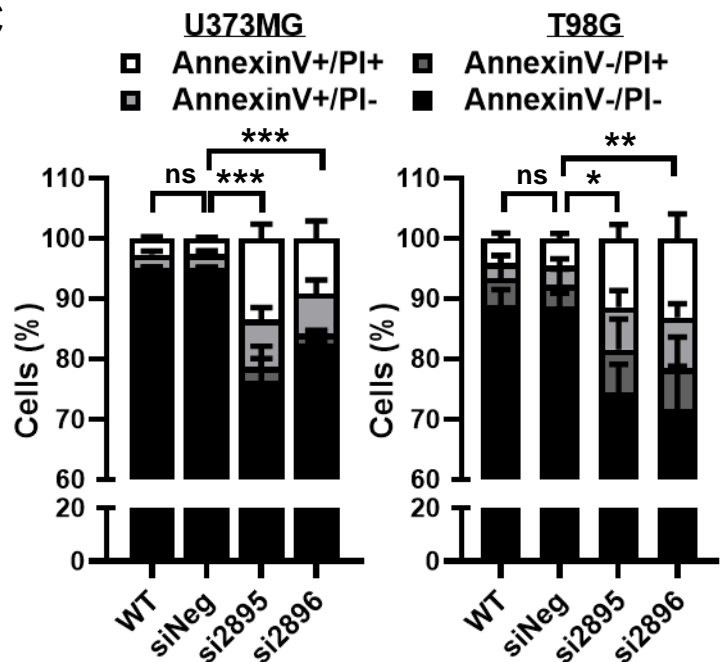

**Supplementary figure 2. Reduced CEBPD expression attenuates cell viability and induces cell apoptosis in GBM.** (A) The U373MG or T98G cells were transiently transfected with control siRNA or CEBPD siRNA for 72 h and then subjected to CCK-8 viability assay. (B) Caspase 3/7 activity is increased in CEBPD knockdown GBM cells. Cells were harvested from U373MG or T98G stable clones and caspase-3/7 activity was determined by Caspase-Glo® 3/7 Reagent. (C) The U373MG or T98G cells were transiently transfected with control siRNA or CEBPD siRNAs for 72 h and then stained with Annexin V and Propidium Iodide (PI) for flow cytometry analysis. Bars represent the means  $\pm$  SEM from three independent experiments. Differences among groups were determined with one-way or two-way ANOVA followed by Tukey's multiple comparison test. \*\*\* $p < 0.001$ , \*\* $p < 0.01$ , \* $p < 0.05$ . ns: no significant; shLuc: shRNA for Luciferase; shB7, shC7: shRNAs for CEBPD; WT: parental cells; siNeg: siRNA for Negative control; si2895, si2896: siRNAs for CEBPD.
